# Supplementary material for: Techno-Economic Analysis of the Multiple-Pass Ultrasonication with Mechanical Homogenization (MPUMH) Processing of Processed Carrot Discards to Puree
Source: MDPI journal article supplement (doi:10.3390/foods12010157), 2022-12-28
Supplement: s1 [file s1]

## Supplementary Material

Table S1 Unit production cost (Carrot puree/can) weighing 150 g for (i) Base case (ii) Case 2

| Description                 | Sale price/unit (Can\$) | Base case    | Case 2       |
|-----------------------------|-------------------------|--------------|--------------|
| Number of carrot puree cans | 0.6                     | 41,821,972.  | 49,550,805   |
| Total Revenue               |                         | 25,093,183.2 | 29,730,483   |
| Operating cost              |                         | 23,601,216.4 | 8,978,682.84 |
| Unit production cost        |                         | 0.56         | 0.18         |

Table S2 Comparison of the total utilities expense incurred for (i) Base case (ii) Case 2

| Description     | Unit cost (Can\$) | Base case   |                     | Case 2      |                     |
|-----------------|-------------------|-------------|---------------------|-------------|---------------------|
|                 |                   | Annual Rate | Annual cost (Can\$) | Annual Rate | Annual cost (Can\$) |
| Std Power       | 0.075             | 2,829,546   | 212,215.95          | 3,351,725   | 251,379.375         |
| Steam           | 12                | 292         | 3,504               | 346         | 4,152               |
| Steam (High P)  | 0                 | 0           | 0                   | 0           | 0                   |
| Cooling Water   | 0.07              | 19,640      | 1,374.8             | 23,269      | 1,628.83            |
| Chilled Water   | 0.4               |             | 0                   |             | 0                   |
| Recovered Steam | 0                 |             | 0                   |             | 0                   |
| Cooling air     | 0                 |             | 0                   |             | 0                   |
| Total Utilities |                   |             | 217,094.75          |             | 257,160.205         |
|                 |                   |             | 0.22 M              |             | 0.26 M              |

\*Base case ( Puree prepared from peeled processed carrot discards), Case 2 (Puree prepared from processed carrot discards and carrots (50:50), without peeling)

Table S3 Comparison of the labor cost incurred for (i) Base case (ii) Case 2

|                           | Base case           | Case 2              |
|---------------------------|---------------------|---------------------|
| Description               | Annual cost (Can\$) | Annual cost (Can\$) |
| Operator                  | 1,205,568           | 1,205,568           |
| Unskilled labor (peeling) | 14,742,000          | 0                   |
| Unskilled labor           | 174,720             | 174,720             |
| Supervisor                | 458,640             | 458,640             |
| Total Labor               | 16,580,928          | 1,838,928           |
|                           | 16.66 M             | 1.84 M              |

Table S4 Total operating cost for (i) Base case (ii) Case 2

| Description        | Base case (Cost Can\$) | Case 2 (Cost Can\$) |
|--------------------|------------------------|---------------------|
| Total Raw Material | 2,152,054.44           | 3,670,755.43        |

|                         |               |              |
|-------------------------|---------------|--------------|
| Total Utilities         | 217,094.75    | 257,160.205  |
| Total Labor             | 16,580,928    | 1,838,928    |
| Lab/Quaity control      | 2,487,139.2   | 275,839.2    |
| Facility Dependent Cost | 2,164,000     | 2,936,000    |
| Total Operating cost    | 23,601,216.39 | 8,978,682.84 |

Since there are no co product credits, Total operating cost is the net operating cost

Table S5 Comprehensive details of costs, revenue and ROI, payback time

| Description                    |           | Value taken from | Base case     | Case 2        |
|--------------------------------|-----------|------------------|---------------|---------------|
| Gross Operating Costs (GOC)    |           | Table A4         | 23,601,216.39 | 8,978,682.839 |
| Total Revenue (TR)             |           | Table A6         | 25,093,183.2  | 29,730,483    |
| Net Income (Taxable Income)    |           | (GOC-TR)         | 1,491,966.81  | 20,751,800.16 |
| Net Profit                     | Tax (35%) |                  | 969,778.4265  | 13,488,670.1  |
| Cash Flow                      |           |                  | 3,133,778.427 | 16,424,670.1  |
| Total Capital Investment (TCI) |           | Table A5         | 10,095,750    | 13,702,500    |
| ROI                            |           |                  | 31.04%        | 119.87%       |
| Payback Time (yr)              |           |                  | 3.2           | 0.83          |

(All prices are in Can\$)

### Formulae used for calculation of parameters

Net profit= (1-0.35)\* Net income

Cash Flow= Net profit + Facility dependent cost<sub>i</sub>

Return on Investment=Cash flow/ Total capital investment

Payback time = Total capital investment / Cash flow

Marks Depreciation (7 Years)

Cash flow is negative for the first two years due to construction and installation of machinery

First year cash flow= 0.40\*(Total fixed capital cost)+working capital

Second year cash flow = 0.6\* (Total fixed capital)

Net Present Value  $NPV = \sum_{i=0}^n \frac{Value_i}{(1+r)^i}$

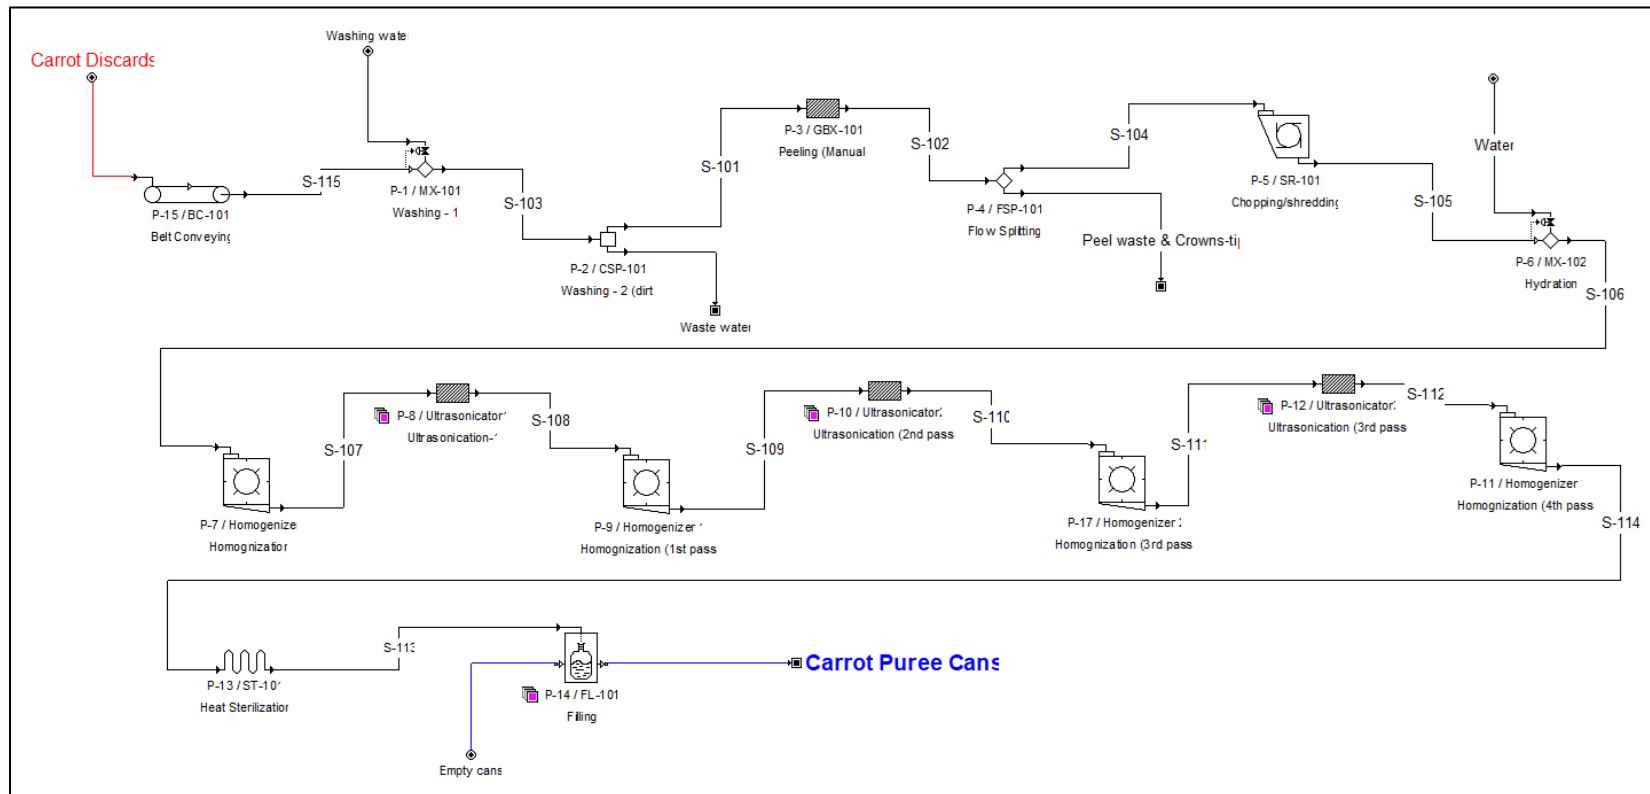

**Figure S1.** Flowsheet of a process model (base case) developed in SuperPro Designer V9.5.
